# Supplementary material
Source: ML conference proceedings conference paper supplement (https://openaccess.thecvf.com/content/CVPR2022/html/Rozumnyi_Motion-From-Blur_3D_Shape_CVPR_2022_paper.html)
Supplement: Supplementary file 2 [file Rozumnyi_Motion-From-Blur_3D_Shape_CVPR_2022_supplemental.zip]

Archive with 3 entries (2 files):
- 00875-supp/
- 00875-supp/supplementary.pdf
- 00875-supp/supplementary_video.mp4
